# Supplementary material for: Huntingtin phosphorylation governs BDNF homeostasis and improves the phenotype of Mecp2 knockout mice
Source: PubMed Central journal article supplement (PMC7005633; doi:10.15252/emmm.201910889), 2020-01-08
Supplement: EMMM-12-e10889-s001.pdf [file EMMM-12-e10889-s001.pdf]

# **Huntingtin phosphorylation governs BDNF homeostasis and improves the phenotype of Mecp2 knockout mice**

Ehinger et al, 2019

Table of contents :

- **Appendix Table S1:** The modified SHIRPA primary screen in WT, HTT<sub>SD</sub> and HTT<sub>SA</sub> mice.
- **Appendix Table S2:** Statistical information for main figures
- **Appendix Table S3:** Statistical information for supplementary figures

Appendix Table S1

|                  | Tests                                              | WT (n=11)                                                                                                                                                                                                               | HTT <sub>SA</sub> (n=12)                                                                                                                                                                                                | HTT <sub>SD</sub> (n= 11)                                                                                                                                                                                               |
|------------------|----------------------------------------------------|-------------------------------------------------------------------------------------------------------------------------------------------------------------------------------------------------------------------------|-------------------------------------------------------------------------------------------------------------------------------------------------------------------------------------------------------------------------|-------------------------------------------------------------------------------------------------------------------------------------------------------------------------------------------------------------------------|
| <b>section 1</b> | <b>In the viewing Jar</b>                          |                                                                                                                                                                                                                         |                                                                                                                                                                                                                         |                                                                                                                                                                                                                         |
|                  | Coat color                                         | Normal: 11 (100%)                                                                                                                                                                                                       | Normal: 12 (100%)                                                                                                                                                                                                       | Normal: 11 (100%)                                                                                                                                                                                                       |
|                  | Hair length                                        | Normal: 11 (100%)                                                                                                                                                                                                       | Normal: 12 (100%)                                                                                                                                                                                                       | Normal: 11 (100%)                                                                                                                                                                                                       |
|                  | Respiration rate                                   | Normal: 11 (100%)                                                                                                                                                                                                       | Normal: 12 (100%)                                                                                                                                                                                                       | Normal: 11 (100%)                                                                                                                                                                                                       |
|                  | Tremor                                             | None: 11 (100%)                                                                                                                                                                                                         | None: 12 (100%)                                                                                                                                                                                                         | None: 11 (100%)                                                                                                                                                                                                         |
|                  | Body position                                      | Sitting or standing: 11 (100%)                                                                                                                                                                                          | Sitting or standing: 12 (100%)                                                                                                                                                                                          | Sitting or standing: 11 (100%)                                                                                                                                                                                          |
|                  | Spontaneous activity                               | Vigorous scratch, groom, moderate movement: 11 (100%)                                                                                                                                                                   | Vigorous scratch, groom, moderate movement: 12 (100%)                                                                                                                                                                   | Vigorous scratch, groom, moderate movement: 11(100%)                                                                                                                                                                    |
|                  | Defecation                                         | None: 10 (91%)<br>Done: 1 (9%)                                                                                                                                                                                          | None: 11 (92%)<br>Done: 1 (8%)                                                                                                                                                                                          | None: 7 (64%)<br>Done: 4 (36%)                                                                                                                                                                                          |
|                  | Urination                                          | None: 11 (100%)<br>Done: 0 (0%)                                                                                                                                                                                         | None: 9 (75%)<br>Done: 3 (25%)                                                                                                                                                                                          | None: 9 (82%)<br>Done: 2 (18%)                                                                                                                                                                                          |
| <b>section 2</b> | <b>In the Arena</b>                                |                                                                                                                                                                                                                         |                                                                                                                                                                                                                         |                                                                                                                                                                                                                         |
|                  | Elapsed time before the mouse starts to move (s)   | Less than 3s: 11 (100%)                                                                                                                                                                                                 | Less than 3s: 12 (100%)                                                                                                                                                                                                 | Less than 3s: 11 (100%)                                                                                                                                                                                                 |
|                  | Transfer arousal                                   | Brief freeze (few sec), then active movement: 11 (100%)                                                                                                                                                                 | Brief freeze (few sec), then active movement: 12 (100%)                                                                                                                                                                 | Brief freeze (few sec), then active movement: 11 (100%)                                                                                                                                                                 |
|                  | Locomotor activity                                 | Average number of squares entered over 1 min exploration: 37 ± 1.859                                                                                                                                                    | Average number of squares entered over 1 min exploration: 38.33 ± 1.707                                                                                                                                                 | Average number of squares entered over 1 min exploration: 27.55 ± 2.644                                                                                                                                                 |
|                  | Palpebral Closure                                  | Eyes wide open: 11 (100%)                                                                                                                                                                                               | Eyes wide open: 12 (100%)                                                                                                                                                                                               | Eyes wide open: 11 (100%)                                                                                                                                                                                               |
|                  | Piloerection                                       | None: 11 (100%)                                                                                                                                                                                                         | None: 12 (100%)                                                                                                                                                                                                         | None: 11 (100%)                                                                                                                                                                                                         |
|                  | Gait                                               | Normal: 11 (100%)                                                                                                                                                                                                       | Normal: 11 (92%)                                                                                                                                                                                                        | Normal: 11 (100%)                                                                                                                                                                                                       |
|                  | Startle Response                                   | Fluid but abnormal: 0 (0%)<br>Preyer reflex (backwards flick of pinnae): 11 (100%)                                                                                                                                      | Fluid but abnormal: 1 (8%)<br>Preyer reflex (backwards flick of pinnae): 12 (100%)                                                                                                                                      | Fluid but abnormal: 0 (0%)<br>Preyer reflex (backwards flick of pinnae): 11 (100%)                                                                                                                                      |
|                  | Pelvic Elevation                                   | Normal (3mm elevation): 11 (100%)                                                                                                                                                                                       | Normal (3mm elevation): 12 (100%)                                                                                                                                                                                       | Normal (3mm elevation): 11 (100%)                                                                                                                                                                                       |
|                  | Tail Elevation                                     | Horizontally extended: 11 (100%)                                                                                                                                                                                        | Horizontally extended: 12 (100%)                                                                                                                                                                                        | Horizontally extended: 11 (100%)                                                                                                                                                                                        |
|                  | Touch Escape                                       | Mild (escape response to firm stroke):11 (100%)                                                                                                                                                                         | Mild (escape response to firm stroke): 12 (100%)                                                                                                                                                                        | Mild (escape response to firm stroke): 11 (100%)                                                                                                                                                                        |
|                  | Tail morphology                                    | Normal: 11 (100%)<br>Kinky: 0 (0%)                                                                                                                                                                                      | Normal: 12 (100%)<br>Kinky: 0 (0%)                                                                                                                                                                                      | Normal: 10 (91%)<br>Kinky: 1 (9%)                                                                                                                                                                                       |
|                  | Convulsions                                        | Phenotype: 0 (0%)                                                                                                                                                                                                       | Phenotype: 0 (0%)                                                                                                                                                                                                       | Phenotype: 0 (0%)                                                                                                                                                                                                       |
| <b>section 3</b> | <b>On or Above the arena</b>                       |                                                                                                                                                                                                                         |                                                                                                                                                                                                                         |                                                                                                                                                                                                                         |
|                  | Wire manoeuver (Horizontal bar)                    | Active grip with hindlegs (5sec): 5 (45%)<br>Difficulty to grasp with hindlegs: 2 (18%)<br>Unable to grasp with hindlegs: 1 (9%)<br>Unable to lift hindlegs, falls within seconds: 3 (27%)<br>Falls immediately: 0 (0%) | Active grip with hindlegs (5sec): 3 (25%)<br>Difficulty to grasp with hindlegs: 3 (25%)<br>Unable to grasp with hindlegs: 1 (8%)<br>Unable to lift hindlegs, falls within seconds: 5 (42%)<br>Falls immediately: 0 (0%) | Active grip with hindlegs (5sec): 2 (18%)<br>Difficulty to grasp with hindlegs: 4 (36%)<br>Unable to grasp with hindlegs: 0 (0%)<br>Unable to lift hindlegs, falls within seconds: 5 (45%)<br>Falls immediately: 0 (0%) |
|                  | Negative geotaxis (vertical grids)                 | Turns and climbs the grid: 11 (100%)                                                                                                                                                                                    | Turns and climbs the grid: 12 (100%)                                                                                                                                                                                    | Turns and climbs the grid: 11 (100%)                                                                                                                                                                                    |
|                  | Positional Passivity : struggles when held by tail | Yes: 11 (100%)                                                                                                                                                                                                          | Yes: 12 (100%)                                                                                                                                                                                                          | Yes: 11 (100%)                                                                                                                                                                                                          |
|                  | Trunk curl                                         | Absence: 11 (100%)                                                                                                                                                                                                      | Absence: 12 (100%)                                                                                                                                                                                                      | Absence: 11 (100%)                                                                                                                                                                                                      |
|                  | Limb grasping                                      | Present: 11 (100%)                                                                                                                                                                                                      | Present: 12 (100%)                                                                                                                                                                                                      | Present: 11 (100%)                                                                                                                                                                                                      |
|                  | Visual Placing                                     | Before vibrassee contact: 11 (100%)                                                                                                                                                                                     | Before vibrassee contact: 12 (100%)                                                                                                                                                                                     | Before vibrassee contact: 11 (100%)                                                                                                                                                                                     |
|                  | Grip Strength                                      | Moderate grip, effective: 11 (100%)                                                                                                                                                                                     | Moderate grip, effective: 12 (100%)                                                                                                                                                                                     | Moderate grip, effective: 11 (100%)                                                                                                                                                                                     |
|                  | Body Tone                                          | Slight resistance: 11 (100%)                                                                                                                                                                                            | Slight resistance: 12 (100%)                                                                                                                                                                                            | Slight resistance: 11 (100%)                                                                                                                                                                                            |
|                  | Head morphology                                    | Normal: 11 (100%)                                                                                                                                                                                                       | Normal: 12 (100%)                                                                                                                                                                                                       | Normal: 11 (100%)                                                                                                                                                                                                       |
|                  | Corneal Reflex                                     | Active single eye blink: 11 (100%)                                                                                                                                                                                      | Active single eye blink: 12 (100%)                                                                                                                                                                                      | Active single eye blink: 11 (100%)                                                                                                                                                                                      |
| <b>section 4</b> | <b>Supinate restraint</b>                          |                                                                                                                                                                                                                         |                                                                                                                                                                                                                         |                                                                                                                                                                                                                         |
|                  | Lacrimation                                        | None: 11 (100%)                                                                                                                                                                                                         | None: 12 (100%)                                                                                                                                                                                                         | None: 11 (100%)                                                                                                                                                                                                         |
|                  | Whisker morphology                                 | Normal: 11 (100%)                                                                                                                                                                                                       | Normal: 12 (100%)                                                                                                                                                                                                       | Normal: 11 (100%)                                                                                                                                                                                                       |
|                  | Tooth morphology                                   | Normal: 11 (100%)                                                                                                                                                                                                       | Normal: 12 (100%)                                                                                                                                                                                                       | Normal: 11 (100%)                                                                                                                                                                                                       |
|                  | Provoked Biting                                    | Present: 11 (100%)                                                                                                                                                                                                      | Present: 12 (100%)                                                                                                                                                                                                      | Present: 11 (100%)                                                                                                                                                                                                      |
|                  | Salivation                                         | None: 11 (100%)                                                                                                                                                                                                         | None: 12 (100%)                                                                                                                                                                                                         | None: 11 (100%)                                                                                                                                                                                                         |
|                  | Heart Rate                                         | Normal: 11 (100%)                                                                                                                                                                                                       | Normal: 12 (100%)                                                                                                                                                                                                       | Normal: 11 (100%)                                                                                                                                                                                                       |
|                  | Abdominal tone                                     | Slight resistance: 11 (100%)                                                                                                                                                                                            | Slight resistance: 12 (100%)                                                                                                                                                                                            | Slight resistance: 11 (100%)                                                                                                                                                                                            |
|                  | Skin color                                         | Pink: 11 (100%)                                                                                                                                                                                                         | Pink: 12 (100%)                                                                                                                                                                                                         | Pink: 11 (100%)                                                                                                                                                                                                         |
|                  | Toe pinch                                          | Slight withdrawal, not brisk: 0 (0%)<br>moderate withdrawal, not brisk: 11 (100%)                                                                                                                                       | Slight withdrawal, not brisk: 1 (8%)<br>moderate withdrawal, not brisk: 11 (92%)                                                                                                                                        | Slight withdrawal, not brisk: 0 (0%)<br>moderate withdrawal, not brisk: 11 (100%)                                                                                                                                       |

**Appendix Table S1 The modified SHIRPA primary screen in WT, HTT<sup>SD</sup> and HTT<sup>SA</sup> mice.**

Results are presented in percentages unless otherwise indicated. No significant differences between genotypes were observed.

**Appendix Table S2 : Statistical information for main figures**

| Figure 1B            | Unpaired t test        | P value | Label |
|----------------------|------------------------|---------|-------|
| anterograde velocity | WT siMecp2 vs WT siCtl | 0.0001  | ***   |
| retrograde velocity  | WT siMecp2 vs WT siCtl | 0.002   | **    |
| mean speed           | WT siMecp2 vs WT siCtl | 0.0004  | ***   |
| Flow                 | WT siMecp2 vs WT siCtl | 0.023   | *     |

| Figure 1C      | Kruskal-Wallis test | P value | Label |
|----------------|---------------------|---------|-------|
| Cell viability |                     | 0.1418  | ns    |

| Figure 1D            | One way ANOVA                     | P value  | Label |
|----------------------|-----------------------------------|----------|-------|
| mean velocity        |                                   | 0.0002   | ***   |
|                      | Tukey's multiple comparisons test |          | Label |
|                      | WT vs. HTTSD                      |          | ***   |
|                      | WT vs. HTTSA                      |          | ns    |
|                      | HTTSD vs. HTTSA                   |          | ns    |
| anterograde velocity |                                   | < 0,0001 | ****  |
|                      | Tukey's multiple comparisons test |          | Label |
|                      | WT vs. HTTSD                      |          | ****  |
|                      | WT vs. HTTSA                      |          | ns    |
|                      | HTTSD vs. HTTSA                   |          | ****  |
| Retrograde velocity  |                                   | 0.0007   | ***   |
|                      | Tukey's multiple comparisons test |          | Label |
|                      | WT vs. HTTSD                      |          | ns    |
|                      | WT vs. HTTSA                      |          | **    |
|                      | HTTSD vs. HTTSA                   |          | **    |
| Flow                 |                                   | 0.1383   | ns    |

| Figure 1E     | One way ANOVA                     | P value  | Label |
|---------------|-----------------------------------|----------|-------|
|               |                                   | < 0,0001 | ****  |
|               | Tukey's multiple comparisons test |          | Label |
| mean velocity | WT siCtl vs. WT siMecp2           |          | **    |
|               | WT siCtl vs. SD siMecp2           |          | ns    |
|               | WT siCtl vs. SA siMecp2           |          | *     |
|               | WT siMecp2 vs. SD siMecp2         |          | ****  |
|               | WT siMecp2 vs. SA siMecp2         |          | ns    |
|               | DD siMecp2 vs. SA siMecp2         |          | ****  |

|                      |                                   |          |       |
|----------------------|-----------------------------------|----------|-------|
|                      |                                   | < 0,0001 | ****  |
|                      | Tukey's multiple comparisons test |          | Label |
| anterograde velocity | WT siCtl vs. WT siMecp2           |          | ****  |
|                      | WT siCtl vs. SD siMecp2           |          | ns    |
|                      | WT siCtl vs. SA siMecp2           |          | ****  |
|                      | WT siMecp2 vs. SD siMecp2         |          | ***   |
|                      | WT siMecp2 vs. SA siMecp2         |          | ns    |
|                      | DD siMecp2 vs. SA siMecp2         |          | ****  |
|                      |                                   | 0.0043   | **    |
|                      | Tukey's multiple comparisons test |          | Label |
| Retrograde velocity  | WT siCtl vs. WT siMecp2           |          | *     |
|                      | WT siCtl vs. SD siMecp2           |          | ns    |
|                      | WT siCtl vs. SA siMecp2           |          | ns    |
|                      | WT siMecp2 vs. SD siMecp2         |          | *     |
|                      | WT siMecp2 vs. SA siMecp2         |          | **    |
|                      | DD siMecp2 vs. SA siMecp2         |          | ns    |
|                      |                                   | 0.0131   | *     |
|                      | Tukey's multiple comparisons test |          | Label |
| Flow                 | WT siCtl vs. WT siMecp2           |          | *     |
|                      | WT siCtl vs. SD siMecp2           |          | ns    |
|                      | WT siCtl vs. SA siMecp2           |          | ns    |
|                      | WT siMecp2 vs. SD siMecp2         |          | *     |
|                      | WT siMecp2 vs. SA siMecp2         |          | ns    |
|                      | DD siMecp2 vs. SA siMecp2         |          | ns    |

|                |                     |         |       |
|----------------|---------------------|---------|-------|
| Figure 1F      | Kruskal-Wallis test | P value | Label |
| Cell viability |                     | 0.157   | ns    |

|                    |                      |         |       |
|--------------------|----------------------|---------|-------|
| Figure 2A          | Mann-Whitney         | P value | Label |
| BDNF content ratio | WT vs KO             | 0,0406  | *     |
|                    | WT vs KO HTTSD       | 0.9988  | ns    |
|                    | WT vs KO HTTSA       | 0,0326  | *     |
|                    | KO vs KO HTTSD       | 0,0333  | *     |
|                    | KO vs KO HTTSA       | 0.8853  | ns    |
|                    | KO HTTSD vs KO HTTSA | 0,0317  | *     |

|           |              |         |       |
|-----------|--------------|---------|-------|
| Figure 2A | Mann-Whitney | P value | Label |
|-----------|--------------|---------|-------|

|       |                      |        |    |
|-------|----------------------|--------|----|
|       |                      |        |    |
| PSD95 | WT vs KO             | 0.0021 | ** |
|       | WT vs KO HTTSD       | 0.9906 | ns |
|       | WT vs KO HTTSA       | 0.0365 | *  |
|       | KO vs KO HTTSD       | 0.0041 | ** |
|       | KO vs KO HTTSA       | 0.5072 | ns |
|       | KO HTTSD vs KO HTTSA | 0.0676 | ns |

|           |                      |         |       |
|-----------|----------------------|---------|-------|
| Figure 2A | Mann-Whitney         | P value | Label |
| TrkBp     | WT vs KO             | 0.0532  | ns    |
|           | WT vs KO HTTSD       | 0.9984  | ns    |
|           | WT vs KO HTTSA       | 0.0557  | ns    |
|           | KO vs KO HTTSD       | 0.0366  | *     |
|           | KO vs KO HTTSA       | >0.9999 | ns    |
|           | KO HTTSD vs KO HTTSA | 0.0385  | *     |

|                 |                            |         |       |
|-----------------|----------------------------|---------|-------|
| Figure 2B       | Log-rank (Mantel-Cox) Test | P value | Label |
| Survival curves | KO vs KO HTTSD             | 0.0264  | *     |
|                 | KO HTTSD vs KO HTTSA       | 0.0065  | **    |

|           |                                   |         |       |
|-----------|-----------------------------------|---------|-------|
| Figure 2C | One way ANOVA                     | P value | Label |
| P30       |                                   | 0.0004  | ***   |
|           | Tukey's multiple comparisons test |         | Label |
|           | KO HTTSD vs KO                    | 0.2683  | ns    |
|           | KO HTTSD vs KO HTTSA              | 0.2845  | ns    |
|           | KO HTTSD vs WT                    | 0.0278  | *     |
|           | KO HTTSA vs KO                    | >0.9999 | ns    |
|           | KO vs WT                          | 0.0007  | ***   |
|           | KO HTTSA vs WT                    | 0.0008  | ***   |
| P50       |                                   | <0.0001 | ****  |
|           | Tukey's multiple comparisons test |         | Label |
|           | KO HTTSD vs KO                    | 0.0216  | *     |
|           | KO HTTSD vs KO HTTSA              | 0.1101  | ns    |
|           | KO HTTSD vs WT                    | <0.0001 | ****  |
|           | KO HTTSA vs KO                    | 0.9697  | ns    |
|           | KO vs WT                          | <0.0001 | ****  |
|           | KO HTTSA vs WT                    | <0.0001 | ****  |

|           |                                  |         |       |
|-----------|----------------------------------|---------|-------|
| Figure 2D | Kruskal-Wallis test              | P value | Label |
| P35       |                                  | 0.0027  | **    |
|           | Dunn's multiple comparisons test |         | Label |
|           | KO vs WT                         | 0.0047  | **    |
|           | KO HTTSD vs WT                   | >0.9999 | ns    |

|     |                                  |         |       |
|-----|----------------------------------|---------|-------|
|     |                                  |         |       |
|     | KO HTTSA vs WT                   | 0.4928  | ns    |
|     | KO HTTSD vs KO                   | 0.0099  | **    |
|     | KO HTTSA vs KO                   | 0.3212  | ns    |
|     | KO HTTSD vs KO HTTSA             | >0.9999 | ns    |
|     |                                  | <0.0001 | ****  |
| P55 | Dunn's multiple comparisons test |         | Label |
|     | KO vs WT                         | <0.0001 | ****  |
|     | KO HTTSD vs WT                   | 0.5789  | ns    |
|     | KO HTTSA vs WT                   | 0.0001  | ***   |
|     | KO HTTSD vs KO                   | 0.0215  | *     |
|     | KO HTTSA vs KO                   | >0.9999 | ns    |
|     | KO HTTSD vs KO HTTSA             | 0.0229  | *     |

|           |                                  |         |       |
|-----------|----------------------------------|---------|-------|
| Figure 2E | Kruskal-Wallis test              | P value | Label |
|           |                                  | 0.0042  | **    |
| P35       | Dunn's multiple comparisons test |         | Label |
|           | KO vs WT                         | 0.0291  | *     |
|           | KO HTTSD vs WT                   | 0.5387  | ns    |
|           | KO HTTSA vs WT                   | 0.0012  | **    |
|           | KO HTTSD vs KO                   | 0.0961  | ns    |
|           | KO HTTSA vs KO                   | 0.2148  | ns    |
|           | KO HTTSD vs KO HTTSA             | 0.0049  | **    |
| P55       |                                  | 0.0003  | ***   |
|           | Fisher's LSD                     |         | Label |
|           | KO vs WT                         | <0.0001 | ****  |
|           | KO HTTSD vs WT                   | 0.0776  | ns    |
|           | KO HTTSA vs WT                   | 0.0008  | ***   |
|           | KO HTTSD vs KO                   | 0.0133  | *     |
|           | KO HTTSA vs KO                   | 0.6669  | ns    |
|           | KO HTTSD vs KO HTTSA             | 0.055   | ns    |

|           |                                  |         |       |
|-----------|----------------------------------|---------|-------|
| Figure 2F | Kruskal-Wallis test              | P value | Label |
|           |                                  | 0.0028  | **    |
| P35       | Dunn's multiple comparisons test |         | Label |
|           | WT vs. KO SD                     | 0.1862  | ns    |
|           | WT vs. KO                        | 0.0174  | *     |
|           | WT vs. KO SA                     | 0.0024  | **    |
|           | KO SD vs. KO                     | >0.9999 | ns    |
|           | KO SD vs. KO SA                  | >0.9999 | ns    |

|  |              |         |    |
|--|--------------|---------|----|
|  | KO vs. KO SA | >0.9999 | ns |
|--|--------------|---------|----|

| Figure 3A        | Mann-Whitney | P value | Label |
|------------------|--------------|---------|-------|
| Vehicle vs FK506 | SiCtl        | 0.0188  | *     |
|                  | Si Mecp2     | 0.0411  | *     |

| Figure 3C            | One way ANOVA                     | P value  | Label |
|----------------------|-----------------------------------|----------|-------|
|                      |                                   | < 0,0001 | ****  |
|                      | Tukey's multiple comparisons test |          | Label |
| mean speed           | siCtl Vehicle vs. siCtl FK506     |          | ****  |
|                      | siCtl Vehicle vs. siMecp2 Vehicle |          | ****  |
|                      | siCtl Vehicle vs. siMecp2 FK506   |          | Ns    |
|                      | siCtl FK506 vs. siMecp2 Vehicle   |          | ****  |
|                      | siCtl FK506 vs. siMecp2 FK506     |          | **    |
|                      | siMecp2 Vehicle vs. siMecp2 FK506 |          | ****  |
|                      |                                   | < 0,0001 | ****  |
|                      | Tukey's multiple comparisons test |          | Label |
| anterograde velocity | siCtl Vehicle vs. siCtl FK506     |          | *     |
|                      | siCtl Vehicle vs. siMecp2 Vehicle |          | ****  |
|                      | siCtl Vehicle vs. siMecp2 FK506   |          | ns    |
|                      | siCtl FK506 vs. siMecp2 Vehicle   |          | ****  |
|                      | siCtl FK506 vs. siMecp2 FK506     |          | ns    |
|                      | siMecp2 Vehicle vs. siMecp2 FK506 |          | ****  |
|                      |                                   | < 0,0001 | ****  |
|                      | Tukey's multiple comparisons test |          | Label |
| Retrograde velocity  | siCtl Vehicle vs. siCtl FK506     |          | ns    |
|                      | siCtl Vehicle vs. siMecp2 Vehicle |          | ***   |
|                      | siCtl Vehicle vs. siMecp2 FK506   |          | ns    |
|                      | siCtl FK506 vs. siMecp2 Vehicle   |          | ****  |
|                      | siCtl FK506 vs. siMecp2 FK506     |          | **    |
|                      | siMecp2 Vehicle vs. siMecp2 FK506 |          | **    |
|                      |                                   | < 0,0001 | ****  |
|                      | Tukey's multiple comparisons test |          | Label |
| Flow                 | WT siCtl vs. WT siMecp2           |          | **    |
|                      | WT siCtl vs. SD siMecp2           |          | ***   |
|                      | WT siCtl vs. SA siMecp2           |          | ns    |
|                      | WT siMecp2 vs. SD siMecp2         |          | ****  |
|                      | WT siMecp2 vs. SA siMecp2         |          | ***   |
|                      | DD siMecp2 vs. SA siMecp2         |          | ****  |
|                      | Tukey's multiple comparisons test |          | Label |
| Nb vesicles          | WT siCtl vs. WT siMecp2           |          | ns    |
|                      | WT siCtl vs. SD siMecp2           |          | ns    |
|                      | WT siCtl vs. SA siMecp2           |          | ns    |
|                      | WT siMecp2 vs. SD siMecp2         |          | *     |



|  |                           |  |    |
|--|---------------------------|--|----|
|  | WT siMecp2 vs. SA siMecp2 |  | ns |
|  | SD siMecp2 vs. SA siMecp2 |  | ns |

|             |                    |         |       |
|-------------|--------------------|---------|-------|
| Figure 4A   | Mann-Whitney       | P value | Label |
| pS421 level | KO veh vs KO FK506 | 0.0159  | *     |

|                 |                            |         |       |
|-----------------|----------------------------|---------|-------|
| Figure 4B       | Log-rank (Mantel-Cox) Test | P value | Label |
| Survival curves | KO veh vs KO FK506         | 0.0201  | *     |
|                 | KO HTTSA FK506 vs KO FK506 | 0.0019  | **    |

|           |                    |         |       |
|-----------|--------------------|---------|-------|
| Figure 4C | Mann-Whitney       | P value | Label |
| P55       | KO veh vs KO FK506 | 0.0451  | *     |

|           |                            |         |       |
|-----------|----------------------------|---------|-------|
| Figure 4D | Mann-Whitney               | P value | Label |
| P35       | KO HTTSA FK506 vs KO FK506 | 0.0121  | *     |
|           | KO veh vs KO FK506         | 0.0339  | *     |
| P55       | KO HTTSA FK506 vs KO FK506 | 0.0193  | *     |

|           |                            |         |       |
|-----------|----------------------------|---------|-------|
| Figure 4E | Mann-Whitney               | P value | Label |
| P50       | KO veh vs KO FK506         | 0.0002  | ***   |
|           | KO HTTSA FK506 vs KO FK506 | 0.0498  | *     |

|           |                            |         |       |
|-----------|----------------------------|---------|-------|
| Figure 4F | Mann-Whitney               | P value | Label |
| P60       | KO veh vs KO FK506         | 0.0498  | *     |
|           | KO HTTSA FK506 vs KO FK506 | 0.0006  | ***   |

**Appendix Table S3 : Statistical information for supplementary figures**

|                       |                        |         |       |
|-----------------------|------------------------|---------|-------|
| Figure EV1B           | Unpaired t test        | P value | Label |
| moving vesic nb /axon | WT siMecp2 vs WT siCtl | 0.7797  | ns    |

|             |                     |         |       |
|-------------|---------------------|---------|-------|
| Figure EV1C | Kruskal-Wallis test | P value | Label |
|             |                     | 0.9929  | ns    |

|             |                                   |         |       |
|-------------|-----------------------------------|---------|-------|
| Figure EV1D | One way ANOVA                     | P value | Label |
|             |                                   | 0.7752  | ns    |
|             | Tukey's multiple comparisons test |         | Label |
| mean speed  | WT vs. HTTSD                      |         | ns    |
|             | WT vs. HTTSA                      |         | ns    |
|             | HTTSD vs. HTTSA                   |         | ns    |

|             |                                   |         |       |
|-------------|-----------------------------------|---------|-------|
| Figure EV1F | One way ANOVA                     | P value | Label |
|             |                                   | 0.838   | ns    |
|             | Tukey's multiple comparisons test |         | Label |
| mean speed  | WT siCtl vs. WT siMecp2           |         | ns    |
|             | WT siCtl vs. SD siMecp2           |         | ns    |
|             | WT siCtl vs. SA siMecp2           |         | ns    |
|             | WT siMecp2 vs. SD siMecp2         |         | ns    |
|             | WT siMecp2 vs. SA siMecp2         |         | ns    |
|             | SD siMecp2 vs. SA siMecp2         |         | ns    |

|             |                                  |         |       |
|-------------|----------------------------------|---------|-------|
| Figure EV2F | Kruskal-Wallis test              | P value | Label |
| P55         |                                  | 0.0015  | **    |
|             | Dunn's multiple comparisons test |         | Label |
|             | KO vs WT                         | 0.0085  | **    |
|             | KO HTTSD vs WT                   | 0.053   | ns    |
|             | KO HTTSA vs WT                   | 0.0039  | **    |
|             | KO HTTSD vs KO                   | >0.9999 | ns    |
|             | KO HTTSA vs KO                   | >0.9999 | ns    |
|             | KO HTTSD vs KO HTTSA             | >0.9999 | ns    |

|             |                                  |         |       |
|-------------|----------------------------------|---------|-------|
| Figure EV2H | Kruskal-Wallis test              | P value | Label |
| 8 p.m       |                                  | <0.0001 | ****  |
|             | Dunn's multiple comparisons test |         | Label |
|             | KO vs WT                         | 0.0003  | ***   |
|             | KO HTTSD vs WT                   | 0.4609  | ns    |
|             | KO HTTSA vs WT                   | <0.0001 | ****  |
|             | KO HTTSD vs KO                   | 0.3594  | ns    |
|             | KO HTTSA vs KO                   | >0.9999 | ns    |

|  |                      |        |   |
|--|----------------------|--------|---|
|  | KO HTTSD vs KO HTTSA | 0.0325 | * |
|--|----------------------|--------|---|

|             |                    |         |       |
|-------------|--------------------|---------|-------|
| Figure EV3A | Unpaired t test    | P value | Label |
| pS421 level | KO veh vs KO FK506 | 0.0234  | *     |

|             |                    |         |       |
|-------------|--------------------|---------|-------|
| Figure EV3C | Mann-Whitney       | P value | Label |
| pS421 level | KO veh vs KO FK506 | 0.2     | ns    |
