# Supplementary material for: Huntingtin phosphorylation governs BDNF homeostasis and improves the phenotype of Mecp2 knockout mice
Source: PubMed Central journal article supplement (PMC7005633; doi:10.15252/emmm.201910889), 2020-01-08
Supplement: EMMM-12-e10889-s002.pdf [file EMMM-12-e10889-s002.pdf]

## Expanded View Figures

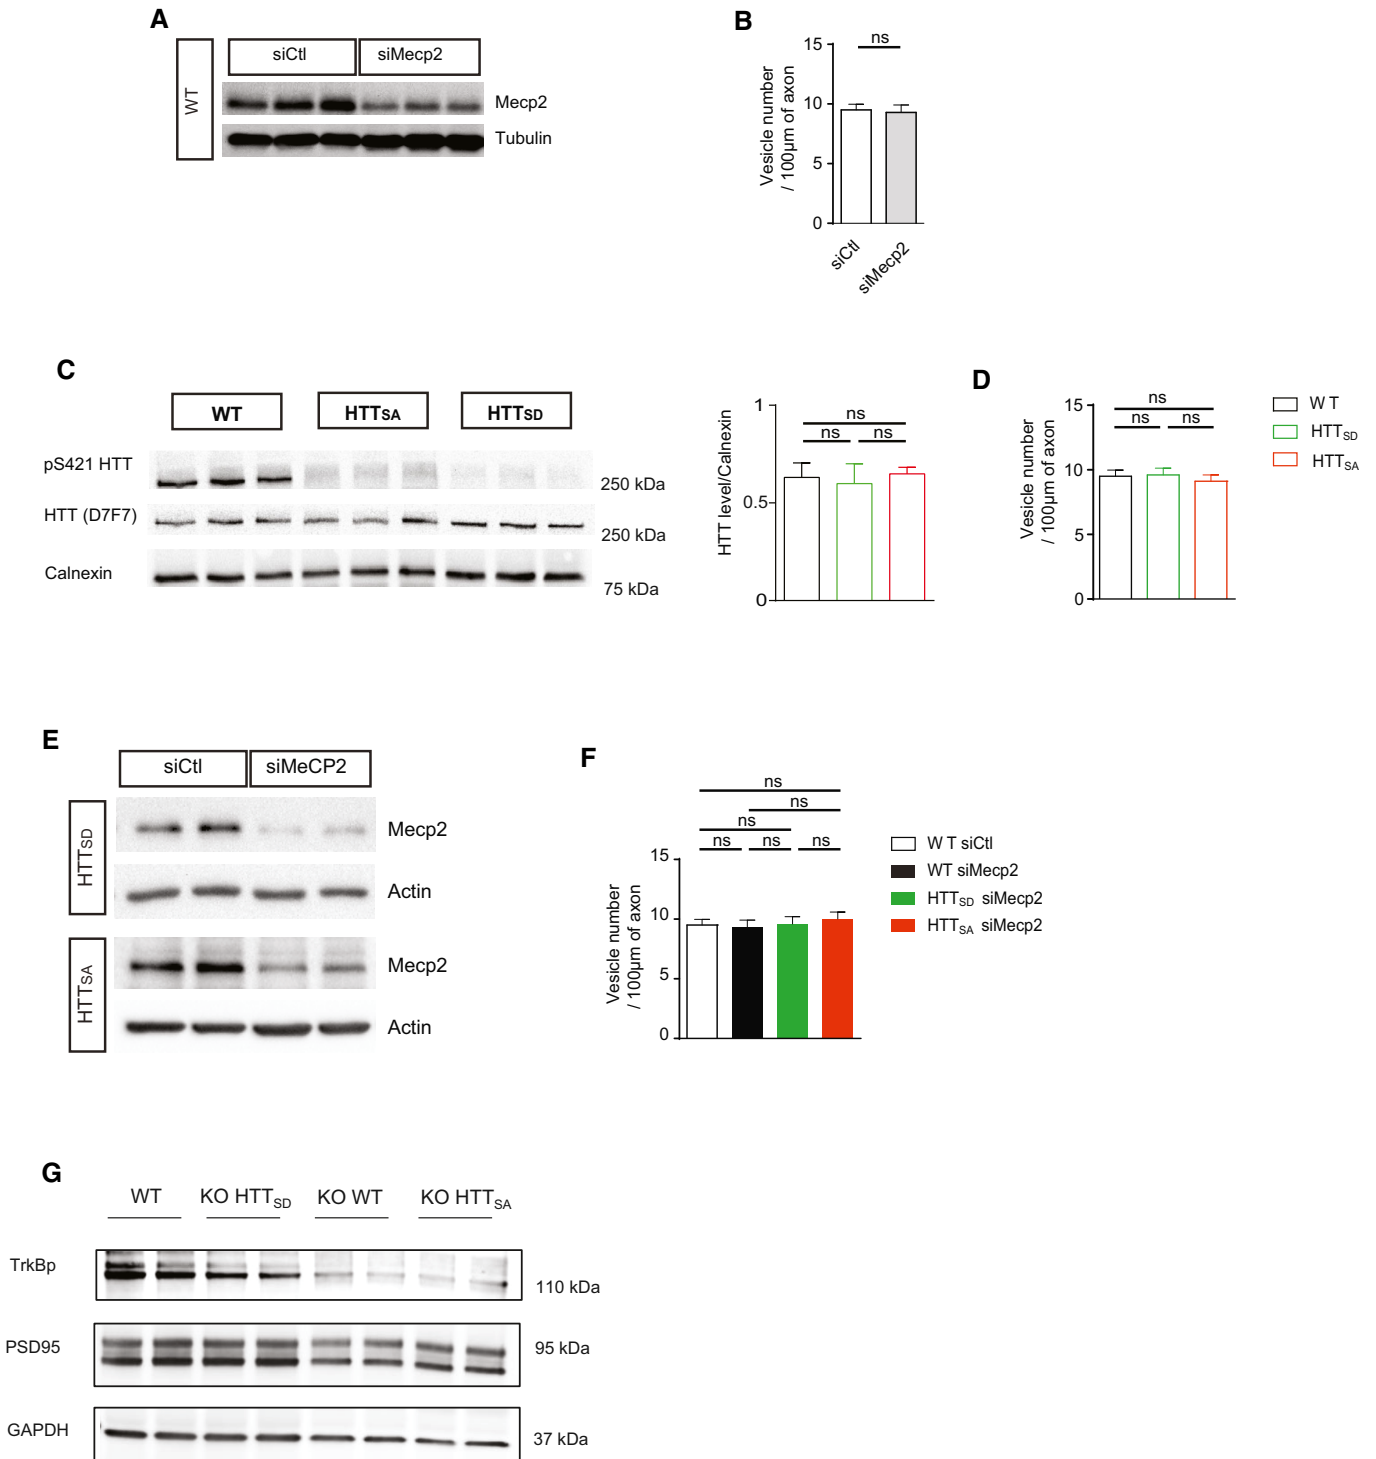

Figure EV1.

**Figure EV1. Mecp2 levels and axonal vesicle number in cortical Mecp2-silenced neurons.**

- A Western blot analysis of DIV 5 cortical neurons transfected with siMecp2 or siControl (siCtl) to assess Mecp2 protein levels.
- B We quantified the number of BDNF-mCherry-containing vesicles trafficking within cortical axons transfected with siMecp2 or siControl (siCtl). Data are presented as the mean  $\pm$  SEM of at least three independent experiments, with 94 siCtl and 81 siMecp2 axons and 894 siCtl and 753 siMecp2 vesicles (unpaired *t*-test).
- C Brain extracts from WT, WT HTT<sub>SD</sub>, and WT HTT<sub>SA</sub> mice were analyzed by Western blotting for total HTT and phospho-HTT. Quantification of *n* = 3 samples per genotype did not reveal any significant differences on total HTT. The mutation of HTT S421 into alanine or aspartic acid abrogated the recognition of phospho-HTT by the phospho-specific antibody, further demonstrating the specificity of HTT phosphorylation at S421. Data are presented as means  $\pm$  SEM, and one-way ANOVA test followed by Tukey's post-hoc analysis for multiple comparisons.
- D We quantified the number of BDNF-mCherry-containing vesicles trafficking within WT, HTT<sub>SA</sub>, or HTT<sub>SD</sub> cortical axons. Data are presented as the mean  $\pm$  SEM of at least three independent experiments, with 80 axons and 700 vesicles per condition (one-way ANOVA test followed by Tukey's post-hoc analysis for multiple comparisons).
- E Western blot analysis of DIV 5 HTT<sub>SA</sub> or HTT<sub>SD</sub> cortical neurons transfected with siMecp2 or siControl (siCtl) to assess Mecp2 protein levels.
- F Quantification of the number of BDNF-mCherry-containing vesicles trafficking within WT, HTT<sub>SA</sub>, or HTT<sub>SD</sub> cortical axons transfected with siMecp2 or siControl (siCtl). Data are presented as the mean  $\pm$  SEM of at least three independent experiments, with WT (*n* = 753 vesicles/81 axons), HTT<sub>SA</sub> (*n* = 812 vesicles/81 axons), or HTT<sub>SD</sub> (*n* = 787 vesicles/82 axons) (one-way ANOVA test followed by Tukey's post-hoc analysis for multiple comparisons). ns = not significant.
- G Representative Western blot analysis of PSD-95 and phospho-TrkB protein levels in striatum samples from WT, KO HTT<sub>SD</sub>, KO WT, and KO HTT<sub>SA</sub> mice.

Source data are available online for this figure.

**Figure EV2. Phenotypic characterization of WT, HTT<sub>SD</sub>, HTT<sub>SA</sub> (A, B, C, and D) mice and WT, KO/HTT<sub>SD</sub>, KO/HTT<sub>SA</sub> (E, F, G, and H) mice.**

- A There were no significant differences in body weight between 6-month-old WT, HTT<sub>SD</sub>, and HTT<sub>SA</sub> mice (WT: *n* = 11; HTT<sub>SD</sub>: *n* = 6, and HTT<sub>SA</sub>: *n* = 10).
- B No significant differences in the distance travelled in the open-field between 4-month-old WT, HTTSD, and HTTSA mice (WT: *n* = 10; HTT<sub>SD</sub>: *n* = 6 HTT<sub>SA</sub>: *n* = 11).
- C No differences between genotypes in the accelerating Rotarod test for assessing motor coordination of 6-month-old WT (*n* = 11), HTT<sub>SD</sub> (*n* = 11), and HTT<sub>SA</sub> mice (*n* = 12).
- D No differences in forelimb strength of 6-month-old WT (*n* = 11), HTT<sub>SD</sub> (*n* = 11), and HTT<sub>SA</sub> mice (*n* = 12) as assessed by the grip strength test.
- E No significant differences in body weight between KO/HTT<sub>SD</sub> (*n* = 32), KO/HTT<sub>SA</sub> (*n* = 24), and KO mice (*n* = 24) at different postnatal timepoints.
- F Distance travelled during the open-field test by WT (*n* = 17), KO (*n* = 20), KO/HTT<sub>SD</sub> (*n* = 19), and KO/HTT<sub>SA</sub> mice (*n* = 17) at P35 and P55. Results are expressed in meters.
- G, H Results of 24-h Phenorack monitoring to measure the spontaneous activity of 12 WT, 12 KO, 8 KO/HTT<sub>SD</sub>, and 7 KO/HTT<sub>SA</sub> mice at P45 (G). Distance travelled at 8 AM versus 8 PM (H).

Data information: Kruskal–Wallis test with Dunn's comparison; \**P* < 0.05, \*\**P* < 0.01, \*\*\**P* < 0.001, ns = not significant. Data are presented as the means  $\pm$  SEM.

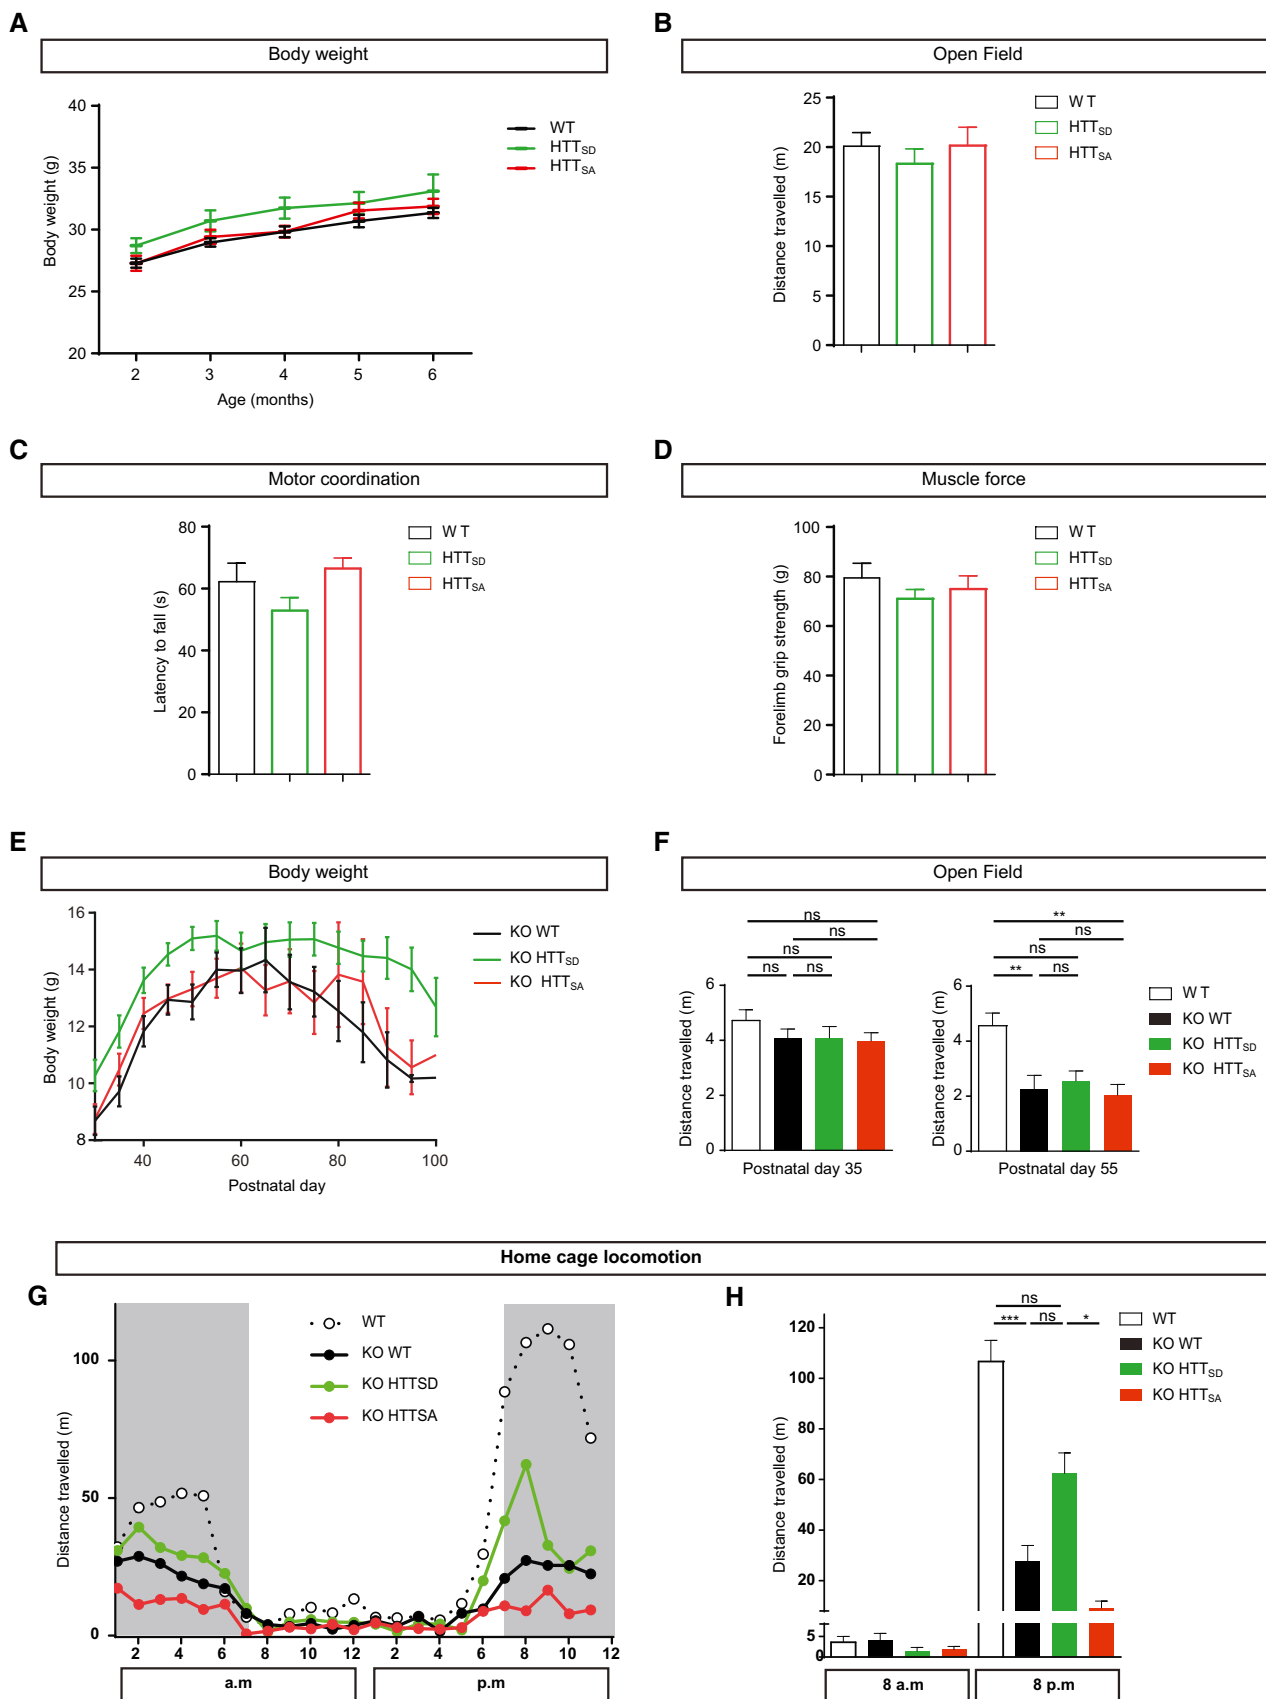

Figure EV2.

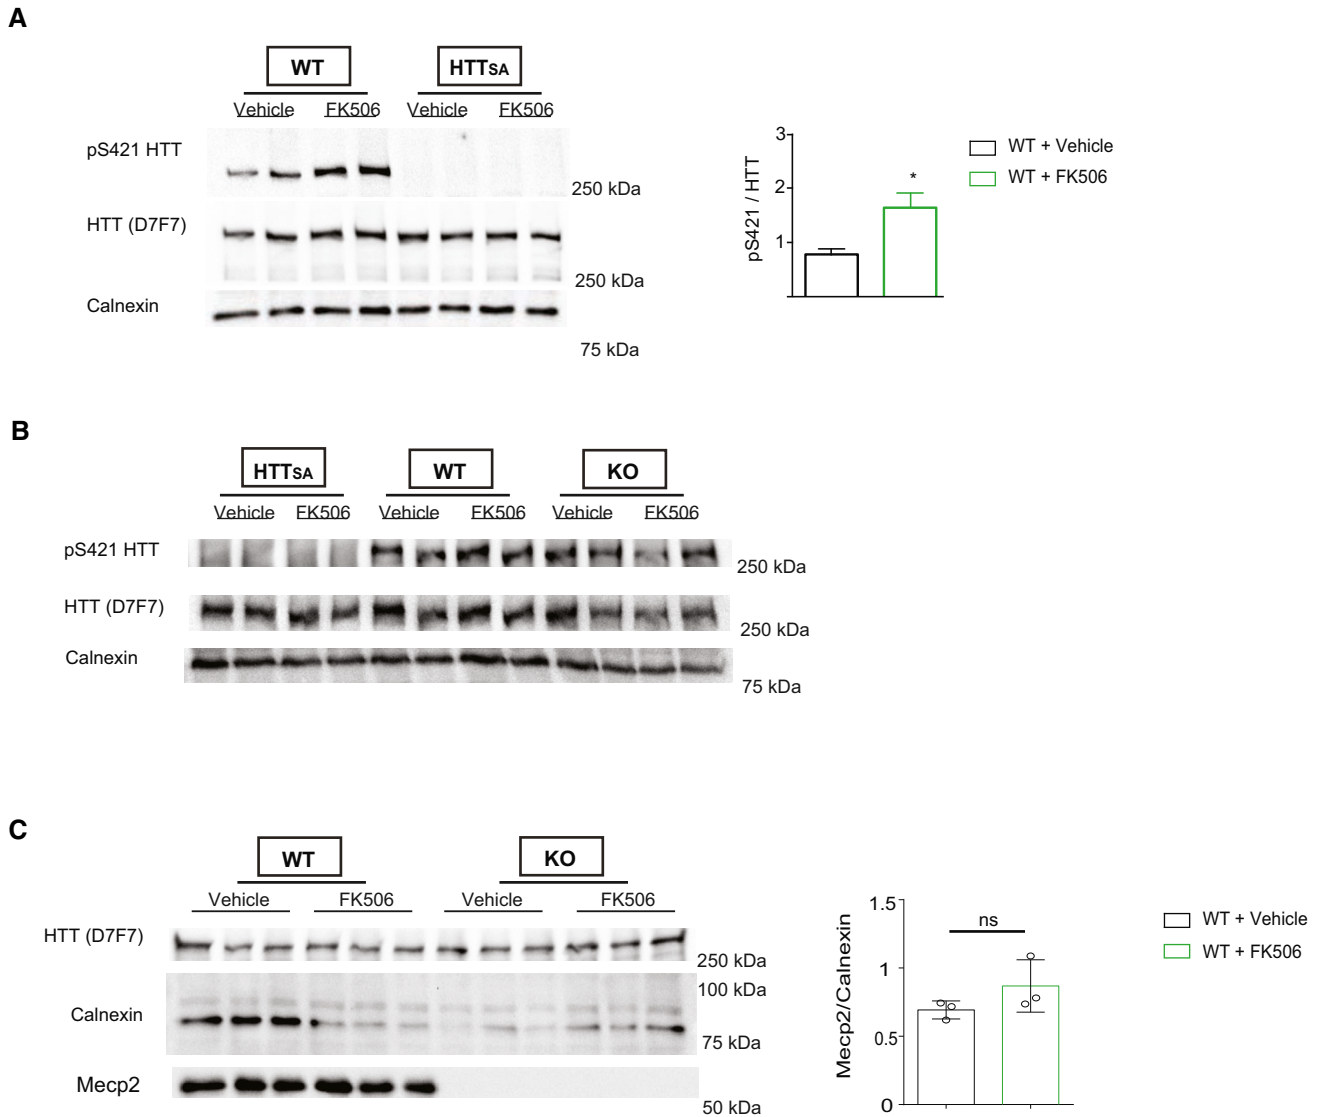

**Figure EV3. Acute and chronic FK506 treatment of WT,  $HTT_{SA}$ , and *Mecp2* KO mice.**

A Western blot of HTT S421 phosphorylation. We treated WT and  $HTT_{SA}$  30-day-old mice intraperitoneally with FK506 (5 mg/kg) or vehicle and analyzed brain extracts for endogenous HTT phosphorylation by Western blotting, 2 h after administration (WT FK506 = 3, WT Vehicle = 6,  $HTT_{SA}$  FK506 = 3,  $HTT_{SA}$  Vehicle = 3). The relative protein level of phospho-HTT was normalized on total HTT protein level and is presented as the ratio. Data are presented as the means  $\pm$  SEM, \* $P$  < 0.05, Mann–Whitney test.

B Western blot of HTT S421 phosphorylation. We treated WT,  $HTT_{SA}$ , and *Mecp2* KO 30-day-old mice intraperitoneally with FK506 (5 mg/kg) or vehicle chronically for 20 days and analyzed brain extracts for endogenous HTT phosphorylation by Western blotting, 2 h after the last administration (KO FK506  $n$  = 2, KO Vehicle  $n$  = 2, WT FK506 = 2, WT Vehicle = 2,  $HTT_{SA}$  FK506 = 2,  $HTT_{SA}$  Vehicle = 2).

C Western blot of HTT and *Mecp2*. We treated WT and *Mecp2* KO 30-day-old mice intraperitoneally with FK506 (5 mg/kg) or vehicle chronically for 20 days (WT FK506 = 3, WT Vehicle = 3,  $HTT_{SA}$  FK506 = 3,  $HTT_{SA}$  Vehicle = 3). Data are presented as the means  $\pm$  SEM, ns = not significant, Mann–Whitney test.

Source data are available online for this figure.

**Figure EV4. Absence of cytotoxicity and increased neuronal activity after chronic FK506 treatment.**

- A FK506 did not increase the levels of cleaved caspase-3, as shown by immunostaining. Representative images of Striatum labeled with Casp3 (green) and DAPI of 50-day-old *Mecp2* KO mice treated with FK506 (right panel) or vehicle (left panel) for 20 days.
- B Absence of apoptosis in the dorsal striatum of *Mecp2*-knockout mice treated chronically with FK506 or with Vehicle. TUNEL assay was used to detect potential apoptotic neurons in 50-day-old *Mecp2*-deficient mice ( $n = 3$  for each stage). Left panel: detection of cells containing fragmented DNA after deoxyribonuclease I treatment of a representative dorsal striatum section originating from one *Mecp2*-knockout and one wild-type animal. No labeled cells were visible after counting all striatum sections of 50-day-old *Mecp2*-knockout mice.
- C FK506 tends to increase the number of cFos-positive neurons. Representative images of striatum labeled with cFos (green) of 50-day-old KO mice treated with FK506 (right panel) or vehicle (middle panel) for 20 days.
- D Vertical scatter plot representing the number of cFos positive neurons counted in the dorsal striatum of P50 Wt placebo ( $n = 2$ -), KO placebo ( $n = 3$ -), and KO FK506 ( $n = 3$ )-treated mice in a picture of length 650  $\mu\text{m}$  and width 445  $\mu\text{m}$ . Each dot represents the mean of three successive sections.

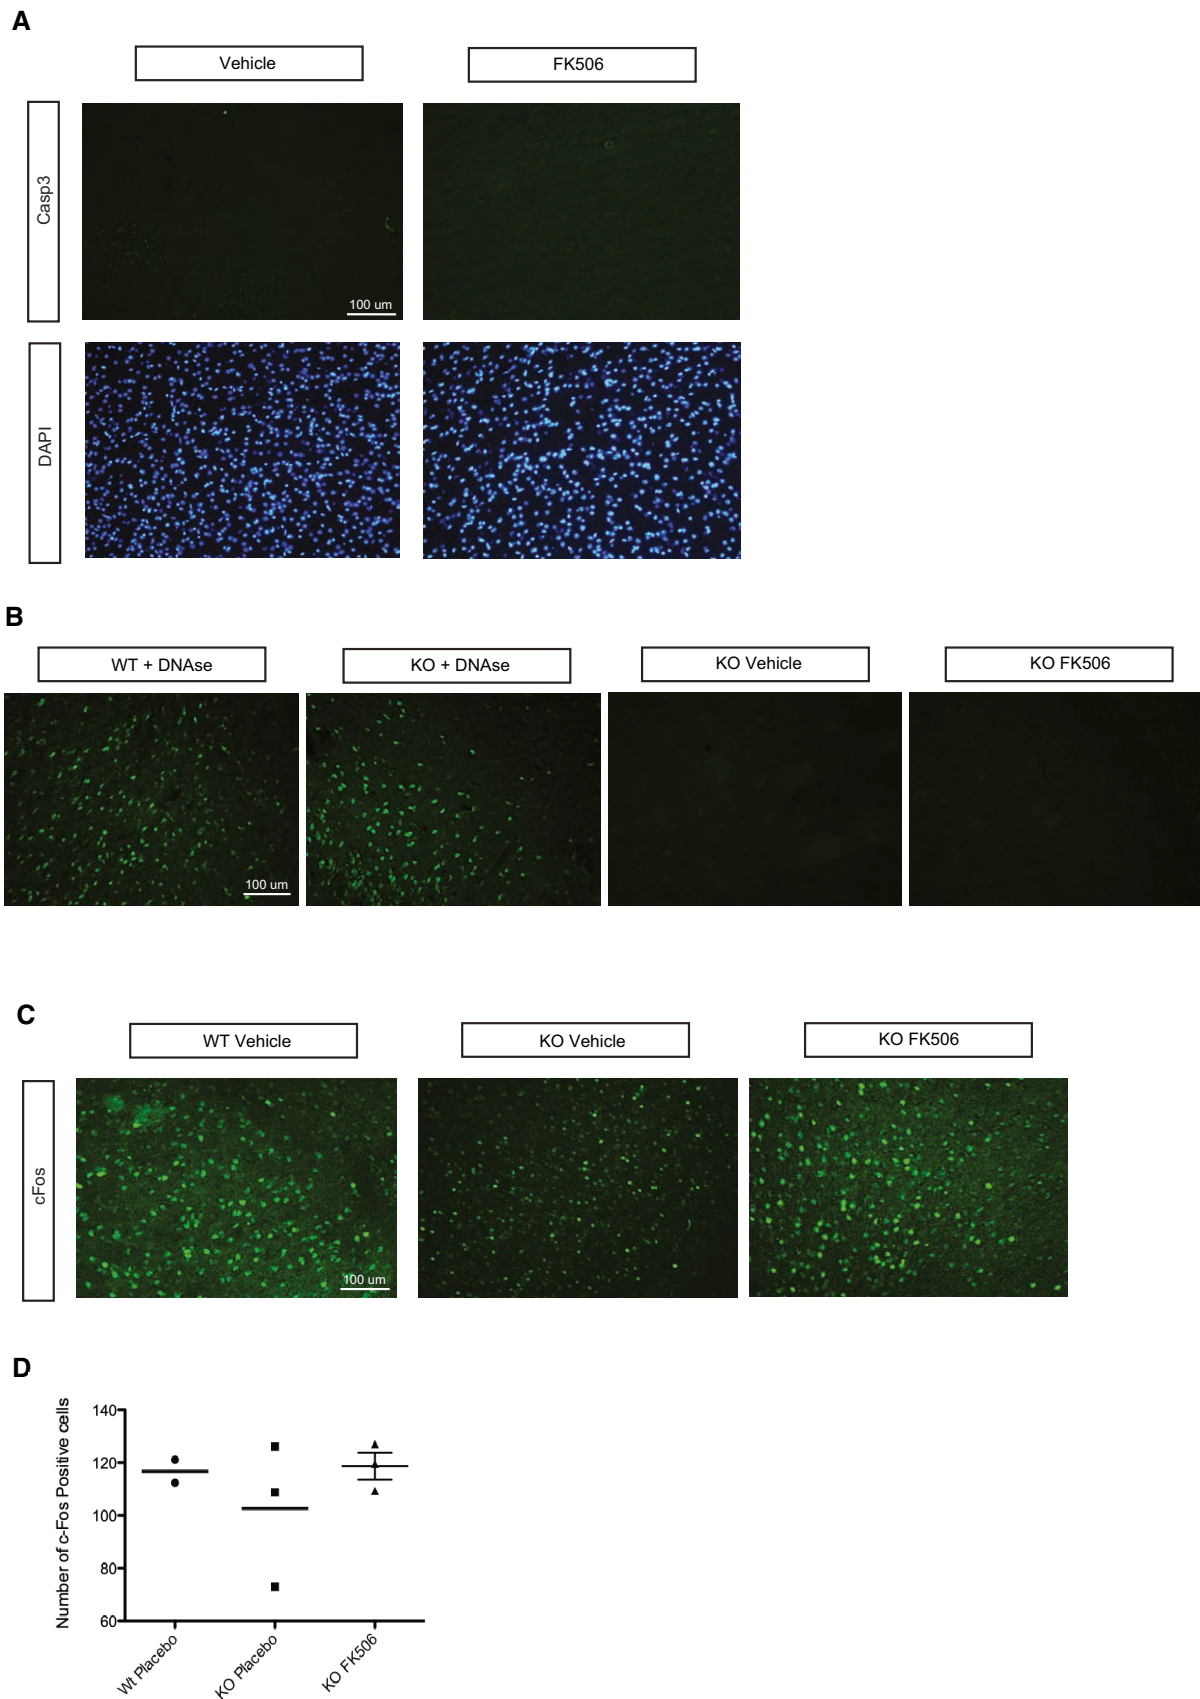

Figure EV4.

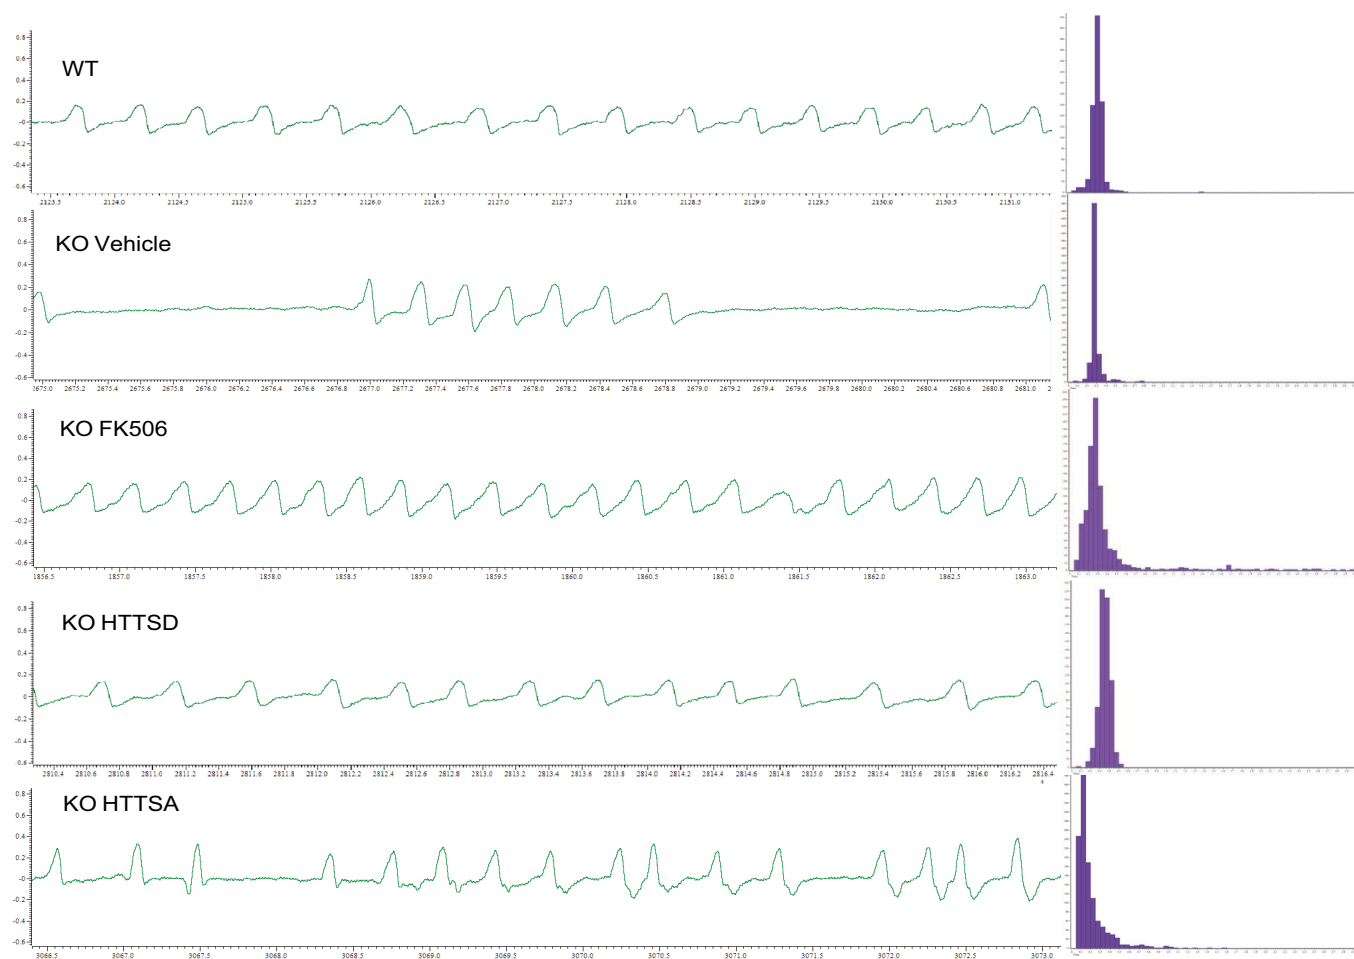

**Figure EV5. Breathing patterns in 55-day-old WT, KO Vehicle, KO FK506, KO/HTT<sub>SD</sub>, and KO/HTT<sub>SA</sub> mice.**

Left: Typical plethysmographic recordings of breathing (inspiration upward) performed in quiet, 55-day-old WT, KO Vehicle, KO FK506, KO/HTT<sub>SD</sub>, and KO/HTT<sub>SA</sub> mice. Right: Distribution of frequency values recorded in WT, KO Vehicle, KO FK506, KO/HTT<sub>SD</sub>, and KO/HTT<sub>SA</sub> mice at P55. Frequency histograms represent the number of occurrences (ordinate) of breathing frequency during 4 consecutive minutes separated in 0.05-s time windows.
