# Supplementary material for: Huntingtin phosphorylation governs BDNF homeostasis and improves the phenotype of Mecp2 knockout mice
Source: PubMed Central journal article supplement (PMC7005633; doi:10.15252/emmm.201910889), 2020-01-08

Full unedited gel for Figure 4A

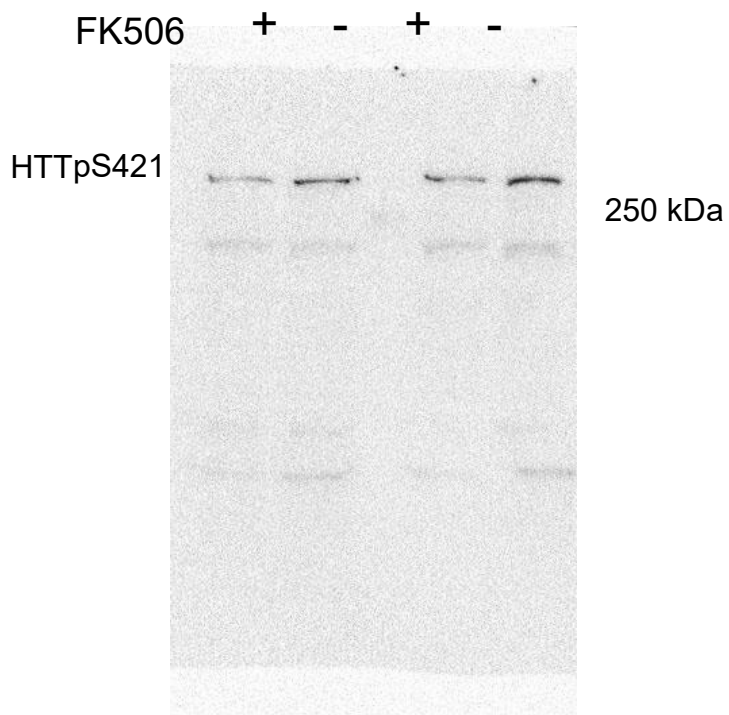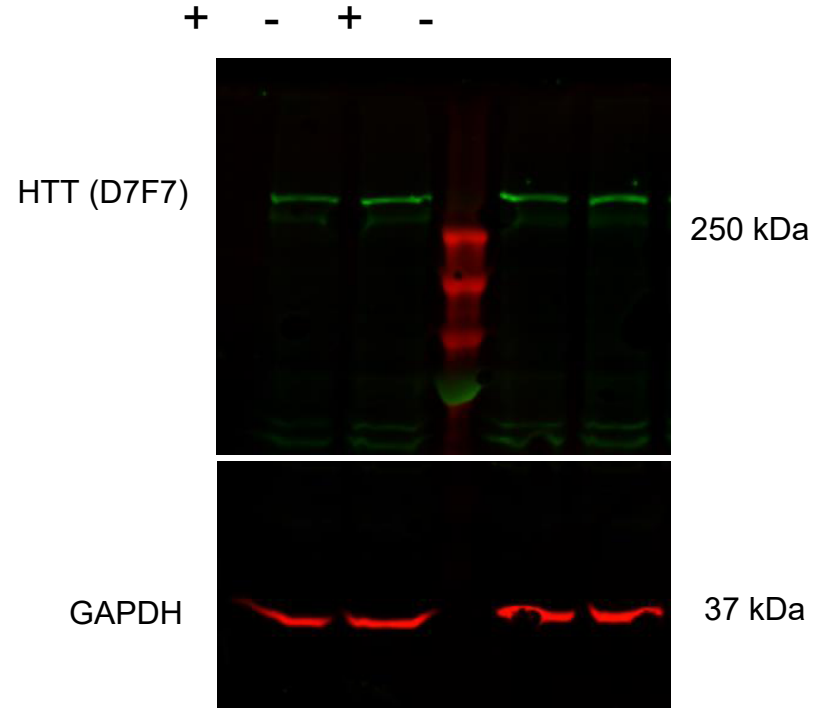

Supplement: EMMM-12-e10889-s006.pdf [file EMMM-12-e10889-s006.pdf]
